# Supplementary material for: Analysis of Predicted Amino Acid Sequences of Diatom Microtubule Center Components
Source: MDPI journal article supplement (doi:10.3390/ijms241612781), 2023-08-14
Supplement: s1 [file s1]

Table S1. Description of GCP sequences identified for diatoms and for out-group.

|                                                              | Species                                               | Strain      | Accession number  | GCP   | length,<br>a.a. | %<br>identity<br>within<br>aspecies |
|--------------------------------------------------------------|-------------------------------------------------------|-------------|-------------------|-------|-----------------|-------------------------------------|
| Animals                                                      | <i>Homo sapiens</i>                                   |             | NP_001243546      | GCP2  | 930             | 15,8<br>10<br>6,4<br>5              |
|                                                              |                                                       |             | NP_006313         | GCP3  | 907             |                                     |
|                                                              |                                                       |             | NP_001273343      | GCP4  | 667             |                                     |
|                                                              |                                                       |             | AAK77662          | GCP5  | 1024            |                                     |
|                                                              |                                                       |             | NP_065194         | GCP6  | 1819            |                                     |
|                                                              |                                                       |             |                   |       |                 |                                     |
| Plants                                                       | <i>Arabidopsis thaliana</i>                           |             | AED92422          | GCP2  | 679             | 14,9<br>15,7                        |
|                                                              |                                                       |             | Q9FG37            | GCP3  | 838             |                                     |
|                                                              |                                                       |             | OAP01290          | GCP4  | 745             |                                     |
|                                                              |                                                       |             |                   |       |                 |                                     |
| Fungi, Ascomycota                                            | <i>Saccharomyces cerevisiae</i>                       |             | QHB09163          | Spc97 | 823             | 12,4                                |
|                                                              |                                                       |             | AJT23326          | SPC98 | 846             |                                     |
|                                                              |                                                       |             |                   |       |                 |                                     |
| Chromista, Heterokonta, Oomycota                             | <i>Phytophthora nicotianae</i>                        |             | KUF64340          | GCP2  | 1210            | 15,2<br>8,8<br>8,6                  |
|                                                              |                                                       |             | KUF76510          | GCP3  | 931             |                                     |
|                                                              |                                                       |             | KUF76976          | GCP4  | 850             |                                     |
|                                                              |                                                       |             | KUG00998          | GCP6  | 1209            |                                     |
|                                                              |                                                       |             |                   |       |                 |                                     |
| Chromista, Heterokonta, Ochrophyta                           | <i>Ectocarpus sp.</i>                                 |             | CAB1097826        | Spc98 | 938             |                                     |
|                                                              |                                                       |             |                   |       |                 |                                     |
| Chromista, Heterokonta, Bacillariophyta, Coscinodiscophyceae |                                                       |             |                   |       |                 |                                     |
|                                                              | <i>Aulacoseira subarctica</i>                         | CCAP_1002/5 | CAMPEP_0172433114 | GCP2  | 468             | 6,7                                 |
|                                                              | <i>Corethron pennatum</i>                             | L29A3       | CAMPEP_0200315726 | GCP2  | 491             |                                     |
|                                                              | <i>Corethron hystrix</i>                              | 308         | CAMPEP_0113304990 | GCP2  | 1025            |                                     |
|                                                              |                                                       |             | CAMPEP_0113310304 | GCP3  | 415             |                                     |
|                                                              | <i>Coscinodiscus wailesii</i>                         | CCMP2513    | CAMPEP_0172503672 | GCP3  | 465             | 9,7                                 |
|                                                              |                                                       |             | CAMPEP_0172505900 | GCP4  | 799             |                                     |
|                                                              |                                                       |             |                   |       |                 |                                     |
|                                                              | <i>Dactyliosolen fragilissimus</i>                    |             | CAMPEP_0184873638 | GCP3  | 1022            | 14                                  |
|                                                              |                                                       |             | CAMPEP_0184869688 | GCP2  | 811             |                                     |
|                                                              | Chromista, Heterokonta, Bacillariophyta, Mediophyceae |             |                   |       |                 |                                     |
|                                                              | <i>Attheya septentrionalis</i>                        | CCMP2084    | CAMPEP_0198290388 | GCP2  | 750             | 13,1                                |
|                                                              | <i>Chaetoceros affinis</i>                            | CCMP159     | CAMPEP_0187021282 | GCP2  | 334             |                                     |
|                                                              |                                                       |             | CAMPEP_0187012874 | GCP3  | 221             |                                     |
|                                                              | <i>Chaetoceros curvisetus</i>                         |             | CAMPEP_0187042092 | GCP2  | 557             |                                     |
|                                                              |                                                       |             | CAMPEP_0187074682 | GCP3  | 316             |                                     |
|                                                              | <i>Chaetoceros debilis</i>                            | MM31A-1     | CAMPEP_0200873290 | GCP3  | 886             | 13,9                                |
|                                                              |                                                       |             | CAMPEP_0200895134 | GCP2  | 988             |                                     |
|                                                              | <i>Chaetoceros dichæta</i>                            | CCMP1751    | CAMPEP_0198261590 | GCP3  | 572             | 6,1                                 |
|                                                              |                                                       |             | CAMPEP_0198275018 | GCP2  | 198             |                                     |

|                                                   |           |                   |      |      |      |
|---------------------------------------------------|-----------|-------------------|------|------|------|
| <i>Chaetoceros tenuissimus</i>                    |           | GFH58980          | GCP2 | 1020 |      |
|                                                   |           | GFH48628          | GCP3 | 1006 | 14,5 |
| <i>Chaetoceros neogratile</i>                     | CCMP1317  | CAMPEP_0200991526 | GCP3 | 1085 |      |
|                                                   |           | CAMPEP_0201015168 | GCP2 | 1274 | 13   |
| <i>Chaetoceros</i> sp.                            | GSL56     | CAMPEP_0176479560 | GCP3 | 1030 |      |
| <i>Cyclotella meneghiniana</i>                    | CCMP_338  | CAMPEP_0172279446 | GCP2 | 1350 |      |
|                                                   |           | CAMPEP_0172272694 | GCP3 | 790  | 8,8  |
| <i>Detonula confervacea</i>                       | CCMP_353  | CAMPEP_0172328552 | GCP2 | 1443 |      |
|                                                   |           | CAMPEP_0172325532 | GCP3 | 1003 | 11,2 |
| <i>Ditylum brightwellii</i>                       | GSO104    | CAMPEP_0193981746 | GCP3 | 423  |      |
|                                                   |           | CAMPEP_0193939136 | GCP2 | 523  | 11,4 |
|                                                   | GSO105    | CAMPEP_0187353236 | GCP4 | 353  |      |
|                                                   |           | CAMPEP_0187334744 | GCP3 | 1090 | 6,5  |
|                                                   |           | CAMPEP_0187337376 | GCP2 | 804  | 14,4 |
| <i>Eucampia antarctica</i>                        | CCMP1452  | CAMPEP_0197836786 | GCP2 | 274  |      |
| <i>Extubocellulus spinifer</i>                    | CCMP396   | CAMPEP_0200506788 | GCP4 | 733  |      |
|                                                   |           | CAMPEP_0200505284 | GCP2 | 1698 | 8,7  |
|                                                   |           | CAMPEP_0200506102 | GCP3 | 1424 | 6,3  |
| <i>Leptocylindrus danicus</i>                     | CCMP1856  | CAMPEP_0196824282 | GCP3 | 630  |      |
|                                                   |           | AMPEP_0196824264  | GCP2 | 874  | 14,8 |
| <i>Leptocylindrus danicus</i> var. <i>danicus</i> | B650      | CAMPEP_0116004766 | GCP6 | 530  |      |
|                                                   |           | CAMPEP_0116007126 | GCP3 | 715  | 8,1  |
|                                                   |           | CAMPEP_0116024682 | GCP2 | 1111 | 6,1  |
| <i>Minutocellus polymorphus</i>                   | H13       | CAMPEP_0181031612 | GCP2 | 2129 |      |
|                                                   |           | CAMPEP_0181035666 | GCP3 | 1034 | 8,34 |
|                                                   |           | CAMPEP_0181022260 | GCP4 | 694  | 3,9  |
| <i>Minutocellus polymorphus</i>                   | RCC2270   | CAMPEP_0185814462 | GCP3 | 780  |      |
| <i>Odontella</i>                                  |           | CAMPEP_0113535984 | GCP3 | 1018 |      |
|                                                   |           | CAMPEP_0113560700 | GCP4 | 530  | 10,8 |
| <i>Proboscia alata</i>                            | PI-D3     | CAMPEP_0200179268 | GCP5 | 359  |      |
|                                                   |           | CAMPEP_0200140732 | GCP4 | 695  | 3,2  |
|                                                   |           | CAMPEP_0200139986 | GCP3 | 861  | 6,4  |
|                                                   |           | CAMPEP_0200148558 | GCP2 | 1936 | 2,3  |
| <i>Proboscia inermis</i>                          | CCAP1064  | CAMPEP_0171321380 | GCP4 | 272  |      |
|                                                   |           | CAMPEP_0171303342 | GCP2 | 335  | 13,3 |
| <i>Skeletonema costatum</i>                       | 1716      | CAMPEP_0113380788 | GCP3 | 937  |      |
|                                                   |           | CAMPEP_0113407062 | GCP2 | 750  | 14,5 |
| <i>Skeletonema dohrnii</i>                        | SkelB     | CAMPEP_0192137624 | GCP3 | 697  |      |
| <i>Skeletonema grethae</i>                        | CCMP_1804 | CAMPEP_0201711052 | GCP2 | 480  |      |
| <i>Skeletonema japonicum</i>                      | CCMP2506  | CAMPEP_0201741136 | GCP2 | 797  |      |

|                                                                                                                                                                                                                                                                                                                                                                              |              |                   |                   |      |      |
|------------------------------------------------------------------------------------------------------------------------------------------------------------------------------------------------------------------------------------------------------------------------------------------------------------------------------------------------------------------------------|--------------|-------------------|-------------------|------|------|
| <i>Skeletonema marinoi</i><br><br><i>Skeletonema menzelii</i><br><br><i>Thalassiosira antarctica</i><br><br><i>Thalassiosira gravida</i><br><br><i>Thalassiosira miniscula</i><br><br><i>Thalassiosira oceanica</i><br><br><i>Thalassiosira pseudonana</i><br><br><i>Thalassiosira punctigera</i><br><br><i>Thalassiosira rotula</i><br><br><i>Thalassiosira weissflogii</i> | SkelA        | CAMPEP_0201719476 | GCP3              | 966  | 13,3 |
|                                                                                                                                                                                                                                                                                                                                                                              |              | CAMPEP_0192226214 | GCP3              | 902  |      |
|                                                                                                                                                                                                                                                                                                                                                                              |              | CAMPEP_0192223726 | GCP2              | 531  | 9,4  |
|                                                                                                                                                                                                                                                                                                                                                                              | CCMP793      | CAMPEP_0192258710 | GCP3              | 946  |      |
|                                                                                                                                                                                                                                                                                                                                                                              |              | CAMPEP_0192282762 | GCP2              | 844  | 14,9 |
|                                                                                                                                                                                                                                                                                                                                                                              | CCMP982      | CAMPEP_0200099138 | GCP2              | 792  |      |
|                                                                                                                                                                                                                                                                                                                                                                              |              | CAMPEP_0200087340 | GCP3              | 985  | 15,5 |
|                                                                                                                                                                                                                                                                                                                                                                              | GMp14c1      | CAMPEP_0200701512 | GCP3              | 399  |      |
|                                                                                                                                                                                                                                                                                                                                                                              |              | CAMPEP_0200731306 | GCP2              | 881  | 9    |
|                                                                                                                                                                                                                                                                                                                                                                              | CCMP1093     | CAMPEP_0201090696 | GCP2              | 724  |      |
|                                                                                                                                                                                                                                                                                                                                                                              |              | CAMPEP_0201084504 | GCP3              | 1188 | 10   |
|                                                                                                                                                                                                                                                                                                                                                                              | CCMP1005     | AMPEP_0192942200  | GCP3              | 916  |      |
|                                                                                                                                                                                                                                                                                                                                                                              |              | 262619            | GCP2              | 676  |      |
|                                                                                                                                                                                                                                                                                                                                                                              | Tpunct2005C2 | 6459              | GCP3              | 1092 | 11,2 |
|                                                                                                                                                                                                                                                                                                                                                                              |              | CAMPEP_0172574286 | GCP3              | 617  |      |
|                                                                                                                                                                                                                                                                                                                                                                              | CCMP3096     | CAMPEP_0172576886 | GCP2              | 1522 | 7,6  |
|                                                                                                                                                                                                                                                                                                                                                                              |              | CAMPEP_0192961864 | GCP2              | 1551 |      |
|                                                                                                                                                                                                                                                                                                                                                                              |              | CAMPEP_0192976186 | GCP3              | 1038 | 10   |
|                                                                                                                                                                                                                                                                                                                                                                              |              | CAMPEP_0192997528 | GCP2              | 276  |      |
|                                                                                                                                                                                                                                                                                                                                                                              | GSO102       | CAMPEP_0192994958 | GCP3              | 101  | 8,3  |
|                                                                                                                                                                                                                                                                                                                                                                              |              | CCMP1010          | CAMPEP_0193052944 | GCP3 | 1066 |
|                                                                                                                                                                                                                                                                                                                                                                              | CCMP1336     | CAMPEP_0193053784 | GCP2              | 1833 | 8    |
|                                                                                                                                                                                                                                                                                                                                                                              |              | CAMPEP_0193068758 | GCP2              | 1585 |      |
|                                                                                                                                                                                                                                                                                                                                                                              |              | CAMPEP_0193084036 | GCP3              | 1066 | 11,6 |
| Chromista, Heterokonta, Bacillariophyta, Bacillariophyceae, Urneidophycidae                                                                                                                                                                                                                                                                                                  |              |                   |                   |      |      |
| <i>Asterionellopsis glacialis</i>                                                                                                                                                                                                                                                                                                                                            | CCMP134      | CAMPEP_0199907404 | GCP2              | 811  |      |
|                                                                                                                                                                                                                                                                                                                                                                              |              | CAMPEP_0199883012 | GCP3              | 841  | 17,8 |
| Chromista, Heterokonta,Bacillariophyta, Bacillariophyceae, Fragilariophycidae                                                                                                                                                                                                                                                                                                |              |                   |                   |      |      |
| <i>Ulnaria acus</i>                                                                                                                                                                                                                                                                                                                                                          | CCMP_1798    | 19284             | GCP3              | 726  |      |
|                                                                                                                                                                                                                                                                                                                                                                              |              | 21600             | GCP2              | 1096 | 13,3 |
| <i>Thalassionema frauenfeldii</i>                                                                                                                                                                                                                                                                                                                                            |              | CAMPEP_0178931292 | GCP3              | 548  |      |
| <i>Thalassionema nitzschioides</i>                                                                                                                                                                                                                                                                                                                                           | L26-B        | CAMPEP_0200206608 | GCP3              | 758  |      |
| <i>Thalassiothrix antarctica</i>                                                                                                                                                                                                                                                                                                                                             | L6-D1        | CAMPEP_0200979464 | GCP2              | 1131 |      |
| <i>Fragilaria crotonensis</i>                                                                                                                                                                                                                                                                                                                                                |              | KAI2513735        | GCP2              | 1077 |      |
|                                                                                                                                                                                                                                                                                                                                                                              |              | KAI2505852        | GCP3              | 772  | 11,1 |
| <i>Licmophora paradoxa</i>                                                                                                                                                                                                                                                                                                                                                   | CCMP2313     | AMPEP_0202447606  | GCP3              | 257  |      |
|                                                                                                                                                                                                                                                                                                                                                                              |              | CAMPEP_0202474432 | GCP2              | 651  | 7,8  |
| <i>Staurosira complex</i> sp.                                                                                                                                                                                                                                                                                                                                                | CCMP2646     | CAMPEP_0202510880 | GCP2              | 1114 |      |
| Chromista, Heterokonta, Bacillariophyceae, Bacillariophycidae                                                                                                                                                                                                                                                                                                                |              |                   |                   |      |      |

|                                       |          |                   |      |      |      |
|---------------------------------------|----------|-------------------|------|------|------|
| <i>Amphiprora sp.</i>                 |          | CAMPEP_0186515180 | GCP2 | 1019 |      |
| <i>Amphiprora paludosa</i>            | CCMP125  | CAMPEP_0172461094 | GCP2 | 496  |      |
| <i>Craspedostauros australis</i>      | CCMP3328 | CAMPEP_0198132742 | GCP2 | 213  |      |
|                                       |          | CAMPEP_0198136308 | GCP3 | 383  | 10,4 |
| <i>Cylindrotheca closterium</i>       |          | CAMPEP_0113642850 | GCP3 | 813  |      |
| <i>Fistulifera solaris</i>            |          | GAX12253          | GCP2 | 1232 |      |
|                                       |          | GAX1175           | GCP3 | 787  | 11,4 |
| <i>Fragilariopsis cylindrus</i>       |          | 224880            | GCP3 | 918  |      |
|                                       |          | 207014            | GCP2 | 756  | 16,4 |
| <i>Fragilariopsis kerguelensis</i>    | L26 C5   | CAMPEP_0188062944 | GCP3 | 944  |      |
|                                       |          | CAMPEP_0188071756 | GCP2 | 1542 | 9,6  |
|                                       | L2 C3    | CAMPEP_0199372024 | GCP3 | 944  |      |
|                                       |          | CAMPEP_0199366584 | GCP2 | 1325 | 12,6 |
| <i>Nitzschia inconspicua</i>          |          | KAG7346153        | GCP2 | 1931 |      |
| <i>Nitzschia punctata</i>             | CCMP561  | CAMPEP_0199321270 | GCP3 | 405  |      |
|                                       |          | CAMPEP_0199329008 | GCP2 | 611  | 11,1 |
| <i>Nitzschia sp.</i>                  |          | CAMPEP_0113450388 | GCP3 | 679  |      |
|                                       |          | CAMPEP_0113502030 | GCP2 | 509  | 11   |
| <i>Pseudo-nitzschia arenysensis</i>   | B593     | CAMPEP_0116114752 | GCP3 | 935  |      |
|                                       |          | CAMPEP_0116116392 | GCP2 | 1142 | 15,5 |
| <i>Pseudo-nitzschia australis</i>     | 10249    | CAMPEP_0199655196 | GCP2 | 717  |      |
|                                       |          | CAMPEP_0199653806 | GCP3 | 993  | 13,1 |
| <i>Pseudo-nitzschia delicatissima</i> | B596     | CAMPEP_0116098148 | GCP3 | 948  |      |
|                                       |          | CAMPEP_0116101462 | GCP2 | 1489 | 12,8 |
| <i>Pseudo-nitzschia fraudulenta</i>   | WWA7     | CAMPEP_0199816714 | GCP2 | 448  |      |
|                                       |          | CAMPEP_0199759484 | GCP3 | 317  | 11,3 |
| <i>Pseudo-nitzschia heimii</i>        | UNC1101  | CAMPEP_0197197498 | GCP2 | 630  |      |
|                                       |          | CAMPEP_0197199456 | GCP3 | 371  | 9,3  |
| <i>Pseudo-nitzschia multiseries</i>   |          | 183312            |      |      |      |
|                                       |          |                   | GCP2 | 973  |      |
|                                       |          | 317641            | GCP3 | 876  | 17,3 |
| <i>Pseudo-nitzschia pungens</i>       |          | CAMPEP_0172373338 | GCP2 | 230  |      |
| <i>Phaeodactylum tricornutum</i>      |          | 44333             | GCP3 | 844  |      |
|                                       |          | 47314             | GCP2 | 1275 | 11,9 |
